# Supplementary material for: Papain-catalysed mechanochemical synthesis of oligopeptides by milling and twin-screw extrusion: application in the Juliá–Colonna enantioselective epoxidation
Source: Royal Society of Chemistry journal article supplement (doi:10.1039/c7gc03205f), 2018-01-01
Supplement: c7gc03205f1.pdf [file c7gc03205f1.pdf]

## Supporting Information:

# Papain-catalysed mechanochemical synthesis of oligopeptides by milling and twin-screw extrusion; application in the Juliá-Colonna enantioselective epoxidation

Karen J. Ardila-Fierro,<sup>a</sup> Deborah E. Crawford,<sup>b</sup> Andrea Körner,<sup>c</sup> Stuart L. James,<sup>b</sup>  
Carsten Bolm,<sup>a</sup> and José G. Hernández\*<sup>a</sup>

a) Institute of Organic Chemistry, RWTH Aachen University, Landoltweg 1, D-52074 Aachen, Germany.

b) School of Chemistry and Chemical Engineering, Queen's University Belfast, David Keir Building, Stranmillis Road, Belfast, BT9 5AG, UK.

c) DWI – Leibniz Institut for Interactive Materials e.V., Forckenbeckstr. 50, 52074, Aachen, Germany.

*jose.hernandez@oc.rwth-aachen.de*

## CONTENTS

|                                                                                                                                         |     |
|-----------------------------------------------------------------------------------------------------------------------------------------|-----|
| 1. General information                                                                                                                  | S2  |
| 2. General procedure for the mechanochemical papain catalysed oligomerisation of <b>1a</b> by ball milling                              | S3  |
| 3. General procedure for the mechanochemical papain catalysed oligomerisation of <b>1a</b> in the twin-extruder                         | S4  |
| 4. Representative NMR spectra of <b>2a-d</b> and <b>4a-c</b>                                                                            | S5  |
| 5. Representative IR spectra of <b>2a-d</b>                                                                                             | S10 |
| 6. Thermogravimetric analysis (TGA) of the oligopeptides <b>2a-c</b> made by twin-screw extrusion                                       | S12 |
| 7. Representative MALDI-ToF MS spectra and analysis                                                                                     | S12 |
| 8. Procedure for the Juliá-Colonna epoxidation in solution                                                                              | S17 |
| 9. Procedure for the Juliá-Colonna epoxidation in a ball mill                                                                           | S17 |
| 10. Characterisation of the products <b>4a-c</b>                                                                                        | S18 |
| 11. Enantiomeric ratios of products <b>4a-c</b> determined by chiral stationary phase high-performance liquid chromatography (CSP-HPLC) | S19 |
| 12. E-Factor calculations for the synthesis of oligo-Leu                                                                                | S23 |
| 13. References                                                                                                                          | S24 |

## 1. General information

All NMR spectra were recorded on a VNMRS 400 or a VNMRS 600 spectrometer operating at 400 or 600 MHz for  $^1\text{H}$  NMR and 100 or 150 MHz for  $^{13}\text{C}$  NMR. Proton chemical shifts are reported in parts per million on the  $\delta$  scale and are calibrated using the residual non-deuterated solvent signal as an internal reference (DMSO- $d_6$ :  $\delta = 2.50$  ppm;  $\text{CDCl}_3$ :  $\delta = 7.26$  ppm). Carbon chemical shifts are reported in part per million on the  $\delta$  scale and are calibrated using the residual non-deuterated solvent signal as an internal reference ( $\text{CDCl}_3$ :  $\delta = 77.1$  ppm). Mass spectra were acquired on a Finnigan SSQ7000 (EI, 70 eV) spectrometer. Analytical HPLC measurements for the determination of the enantiomer ratios were performed on an Agilent 1100 and with a chiral stationary phase (254 mm in length, 4.6 mm in internal diameter) (CHIRALPAK® IA; n-heptane:EtOH 80:20; 0.8 mL/min or n-heptane:2-propanol 96:4; 0.8 mL/min; 20 °C; 254 nm. IR-spectra were recorded on a Perkin Elmer 100 FT/IR spectrometer. TGA analysis was done in a Mettler Toledo DSC/TGA 1 Star, ran in air using aluminium pans with a heating rate of 20 degrees per minute.

MALDI-ToF MS Analysis: The peptide samples were dissolved in trifluoroacetic acid (TFA) to a concentration of 5 mg/mL. A matrix solution of  $\alpha$ -cyano-4-hydroxycinnamic acid (CCA) with a concentration of 20 mg/mL in TA80 (80:20, ACN: 0.1% TFA in water) was prepared and sample and matrix solution were mixed in a ratio of 1:1. 1  $\mu\text{L}$  of the sample/matrix solution was prepared on the target plate (ground steel target, Bruker) and dried. Mass spectra were acquired using a 1 kHz Laser Bruker UTX MALDI-ToF mass spectrometer (Bruker, Bremen, Germany) with pulsed ion extraction. The spectra were recorded in the reflector mode with a repetition rate of 1000 Hz signals from positive ions; 3000 spectra were added to a sum spectrum. While recording the sample stage moved in a random fashion on a sample spot allowing 500 laser shots per position. The calibration was carried out externally using a mixture of peptides (Peptide Calibration Standard mono, #8222570 from Bruker Daltonics, Bremen, Germany) prepared on a near neighbour spot. The spectra were baseline subtracted (Top hat algorithm) and mass peak annotation was obtained with the SNAP detection algorithm (width 0.5 at 80% height).

The characterisation of the molecular weight distributions, determination of polydispersity and mixture deconvolution were performed with the Flex Analysis™ software (Bruker Daltonics, Bremen) and the Polymerix™ software tool from Sierra Analytics, Modesto, CA 95356 USA.

Chemicals were purchased from commercial suppliers and used without further purification. Papain from *Carica papaya* powder [ $\geq 3\text{U/mg}$ ] was purchased from Sigma-Aldrich.

Oligomerisation reactions by milling were carried out in a RETSCH MM400 mixer mill using 10 mL milling vessels made of ZrO<sub>2</sub> with one milling ball of 10 mm in diameter of the same material or in a FRITSCH planetary micro mill model “Pulverisette 7 classic line”, using 45 mL milling vessels made of ZrO<sub>2</sub> with five milling balls of the same material (10 mm in diameter) as milling media. Epoxidation experiments by milling were conducted in the planetary ball mill using 12 mL ZrO<sub>2</sub> milling vessels loaded with 20 milling balls of 5 mm in diameter. Extrusion experiments were carried out using a Three-Tec corotating twin-screw extruder, 40/1 L/D, 360L stainless steel with six heating zones.

## 2. General procedure for the mechanochemical papain catalysed oligomerisation of **1a** by ball milling

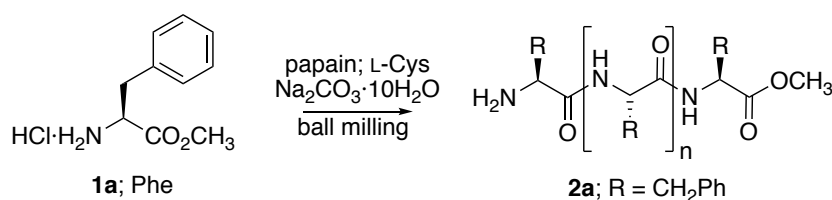

### a) Mixer mill

A mixture of **1a** (49.8 mg, 0.231 mmol), papain powder (20 mg), L-Cys (7.7 mg, 0.064 mmol) and Na<sub>2</sub>CO<sub>3</sub>·10H<sub>2</sub>O (66.1 mg, 0.231 mmol) was milled for 2 h in a mixer-mill at 25 Hz, using a 10 mL ZrO<sub>2</sub> milling jar with one ZrO<sub>2</sub> ball of 10 mm in diameter. After the milling was stopped, the reaction mixture was filtered with water (50 mL). To facilitate the drying of the peptide, the residue can be washed with diethyl ether (20 mL). However, this step can be omitted without affecting the yield of the reaction. Next, the residue was dried at 60 °C overnight to afford the product **2a**. Control experiments in the absence of the mechanical milling, followed by the standard filtration procedure did not afford **2a**. Thus, ruling out the oligomerisation of **1a** during the workup.

### b) Planetary ball mill

A mixture of **1a** (500 mg, 2.318 mmol), papain powder (200 mg), L-Cys (77.81 mg, 0.642 mmol) and Na<sub>2</sub>CO<sub>3</sub>·10H<sub>2</sub>O (663.34 mg, 2.318 mmol) was milled for 2 h in a planetary ball mill at 600 rpm, using a 45 mL ZrO<sub>2</sub> milling jar with five ZrO<sub>2</sub> balls of 10 mm in diameter. After the milling was stopped, the reaction mixture was filtered with water (100 mL). To facilitate the drying of the peptide, the residue can be washed with diethyl ether (50 mL). However, this step can be omitted without affecting the yield of the reaction. Next, the residue was dried at 60 °C overnight to afford the product **2a**.

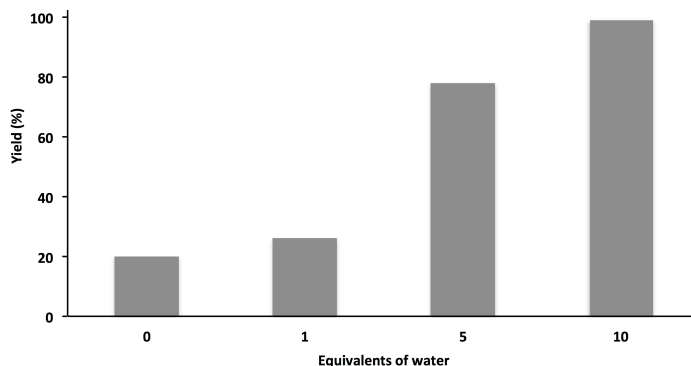

**Figure S1.** Effect of the crystalline water contained in the base on the yield of the oligomerisation of **1a** in the planetary ball mill at 600 rpm for 2 h. Control over the amount of crystalline water added to the reaction was achieved by using  $\text{Na}_2\text{CO}_3$ ,  $\text{Na}_2\text{CO}_3 \cdot \text{H}_2\text{O}$ ,  $\text{Na}_2\text{CO}_3 \cdot 10\text{H}_2\text{O}$  or mixtures of them.

### 3. General procedure for the mechanochemical papain catalysed reaction of **1a** in the twin-extruder

A mixture of **1a** (10 g, 0.046 mol), papain powder (4.0 g), L-Cys (1.55 g, 0.012 mol) and  $\text{Na}_2\text{CO}_3 \cdot 10\text{H}_2\text{O}$  (13.26 g, 0.046 mol) was initially mixed by hand and fed into the volumetric twin-screw hopper. The reagents were introduced into the screw extruder at 30 rpm with the extruder barrel heated at 50 °C. The material started exiting the barrel after 45 min as a molten mixture. After the process was stopped, the reaction mixture was filtered with water (500 mL). To facilitate the drying of the peptide, the residue can be washed with diethyl ether (200 mL). However, this step can be omitted without affecting the yield of the reaction. Next, the residue was dried at 60 °C overnight to afford the product **2a**.

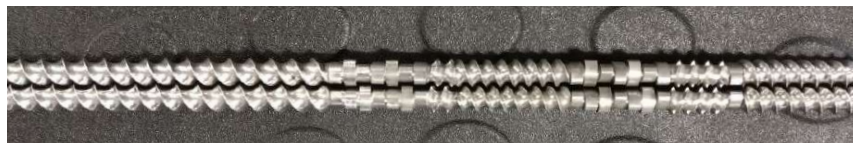

**Figure S2.** Steel twin-screw set configuration employed in the oligomerisation of the amino acids (12 mm in diameter, 40 cm in length).

**4. Representative NMR spectra of 2a-d and 4a-c**  
**<sup>1</sup>H NMR spectrum of oligo-Phe (2a) made by ball milling**

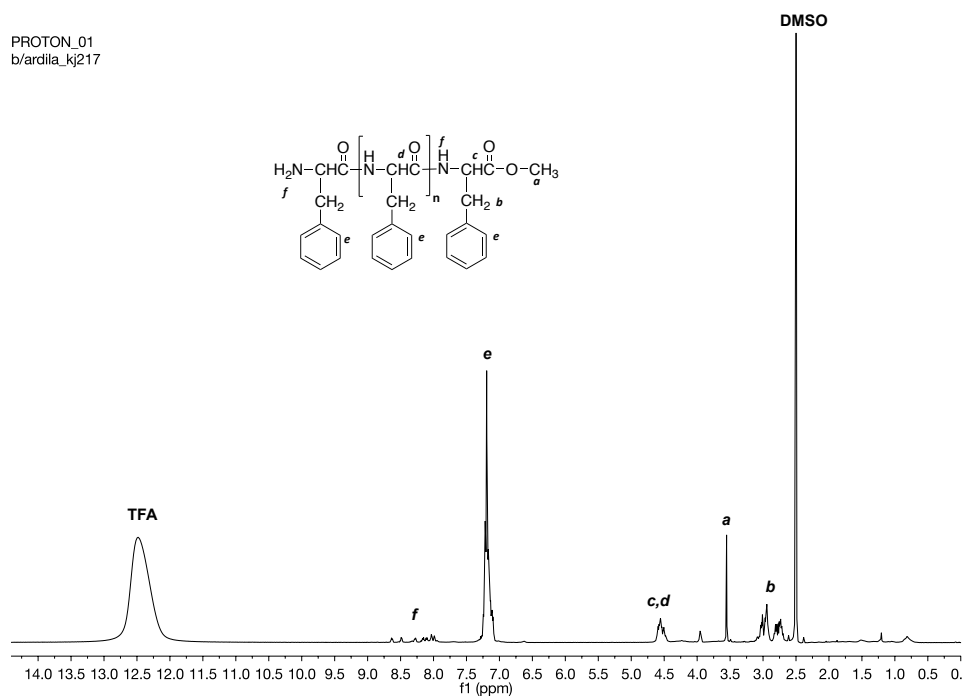

**<sup>1</sup>H NMR spectrum of oligo-Leu (2b) made by ball milling**

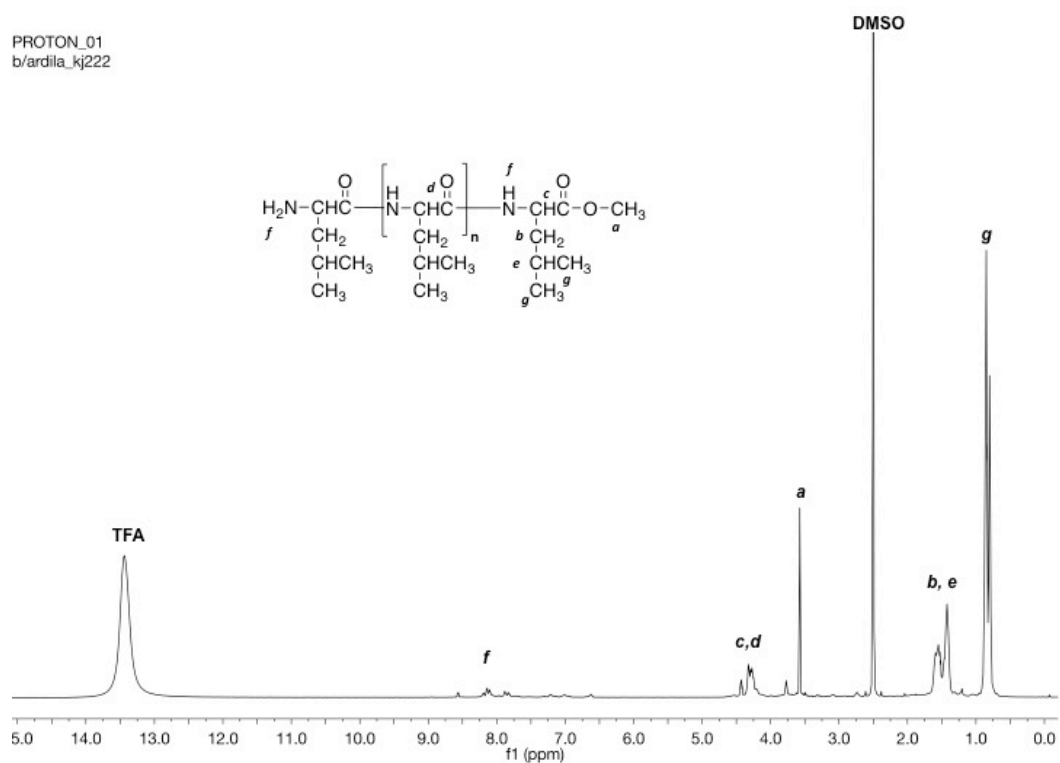

# $^1\text{H}$ NMR spectrum of oligo-Ala (2c) made by extrusion

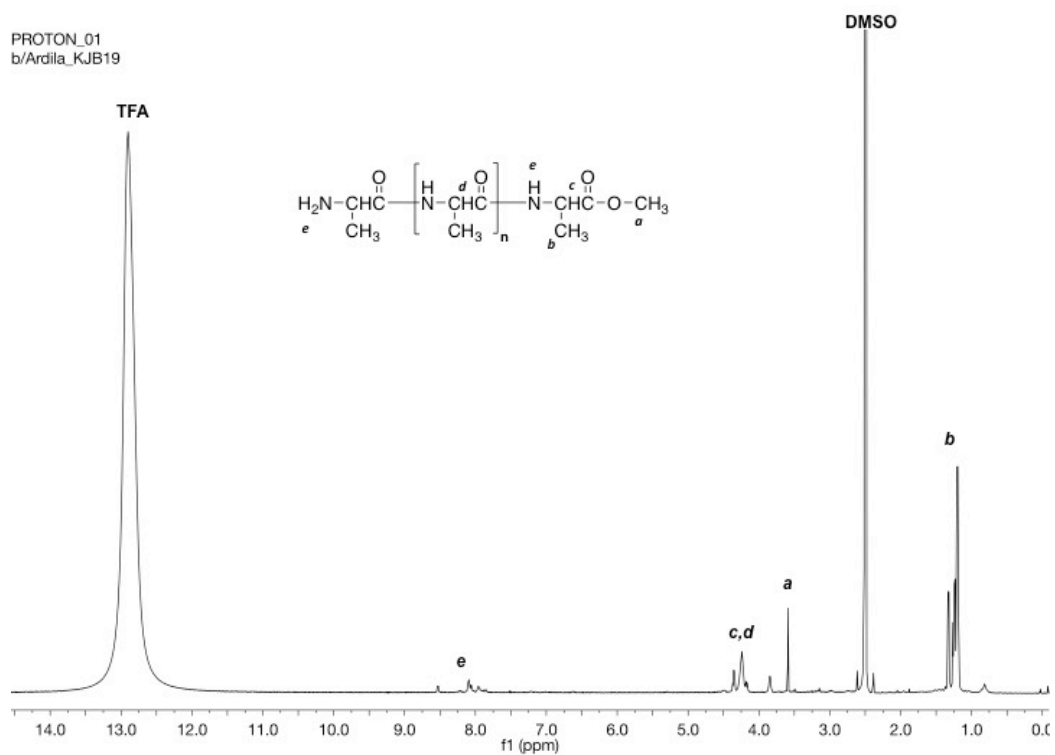

# $^1\text{H}$ NMR spectrum of oligo-Gly (2d) made by ball milling

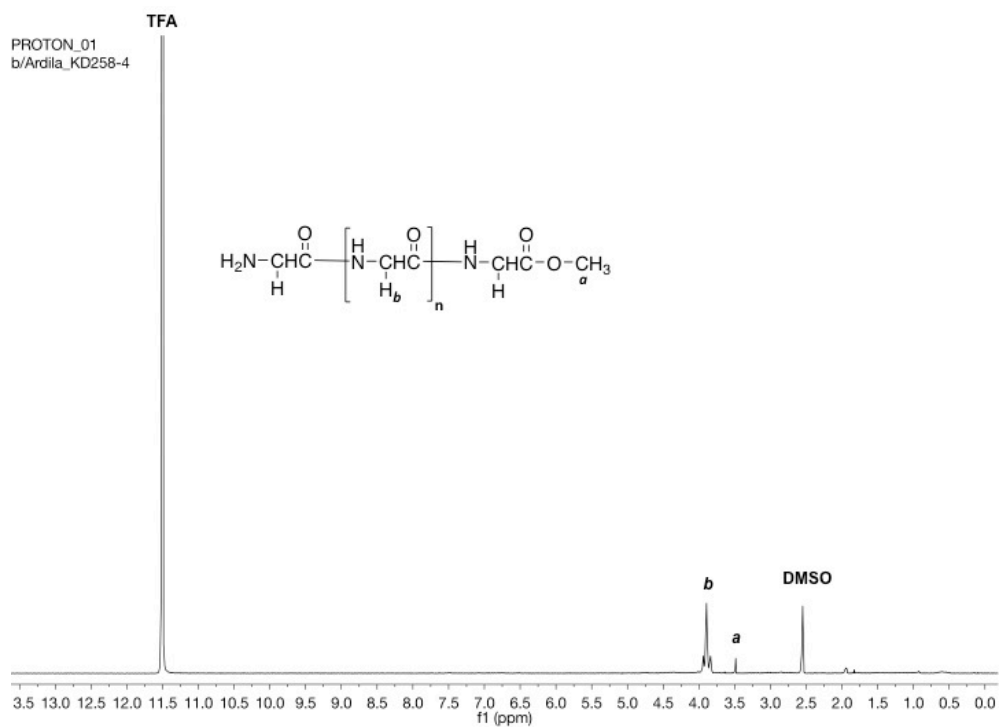

# <sup>1</sup>H NMR spectrum of epoxide 4a

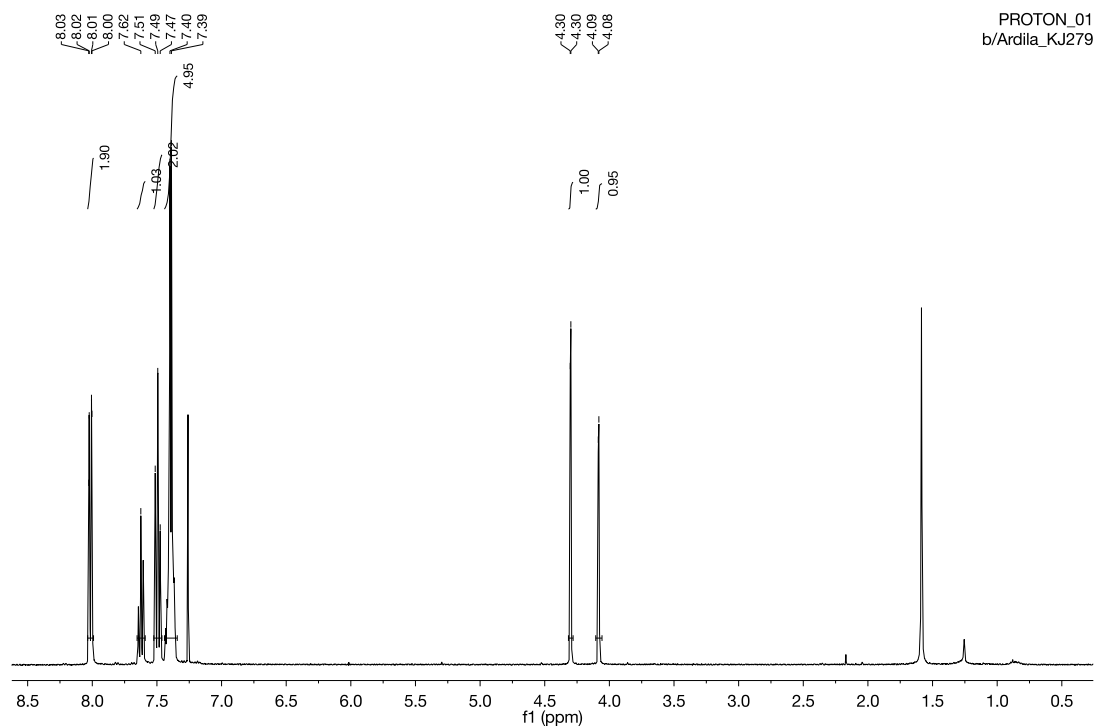

# <sup>13</sup>C NMR spectrum of epoxide 4a

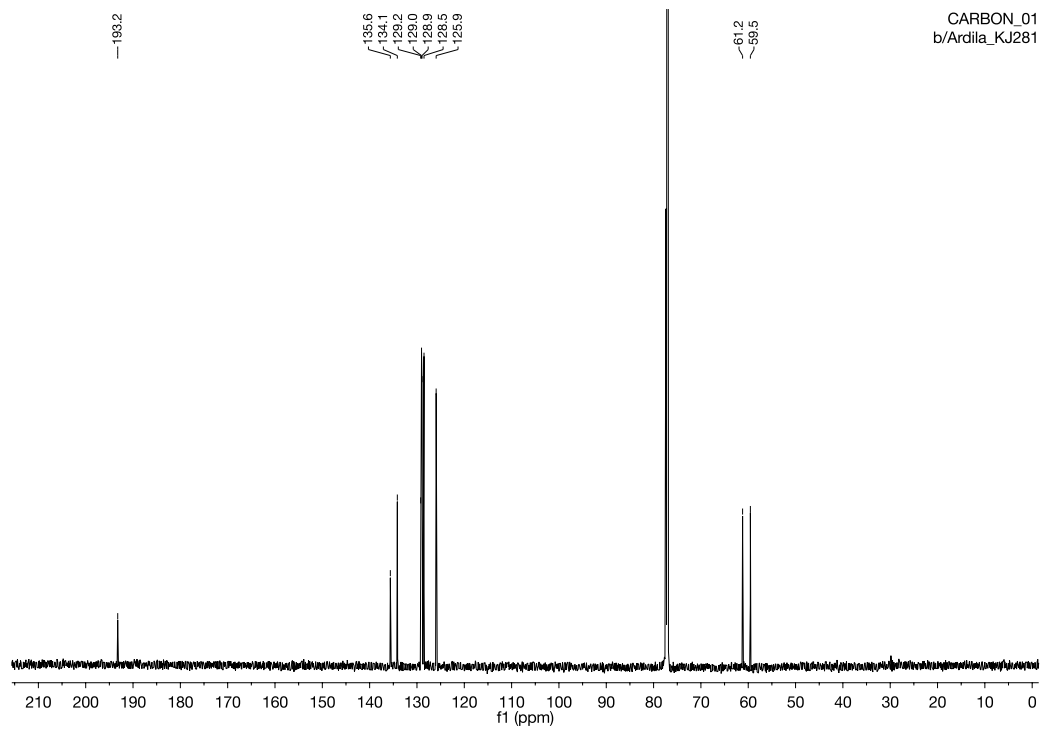

# <sup>1</sup>H NMR spectrum of epoxide 4b

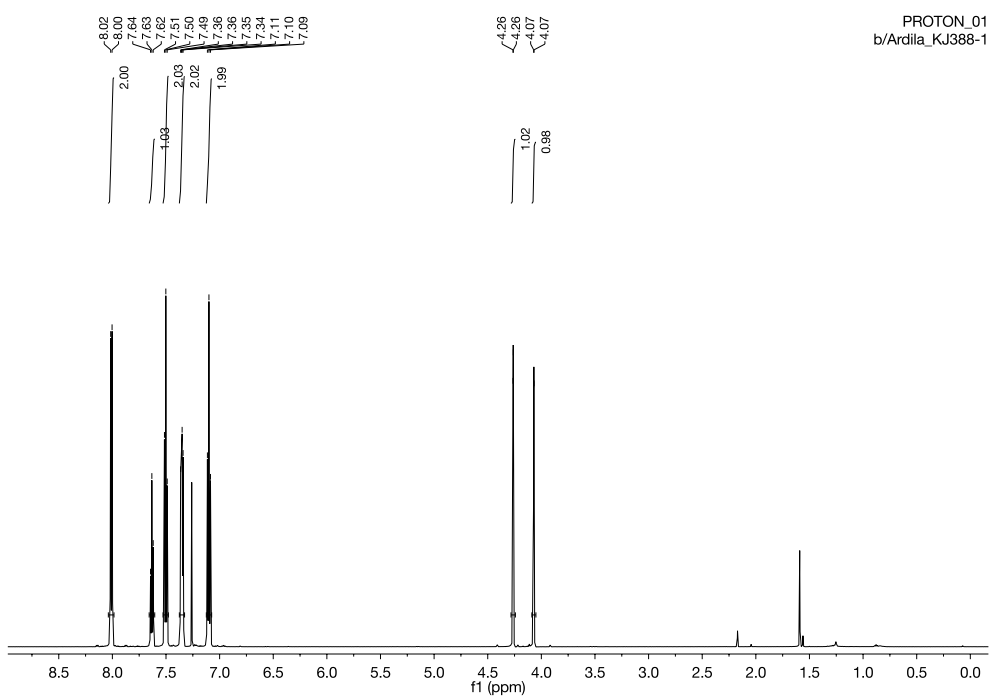

# <sup>13</sup>C NMR spectrum of epoxide 4b

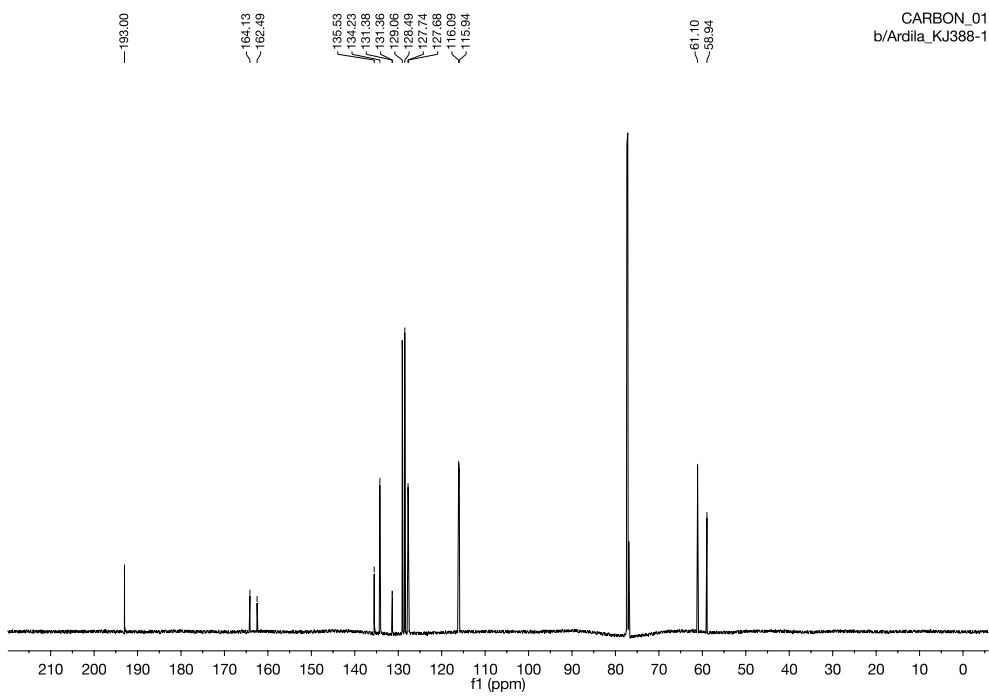



# <sup>1</sup>H NMR spectrum of epoxide 4c

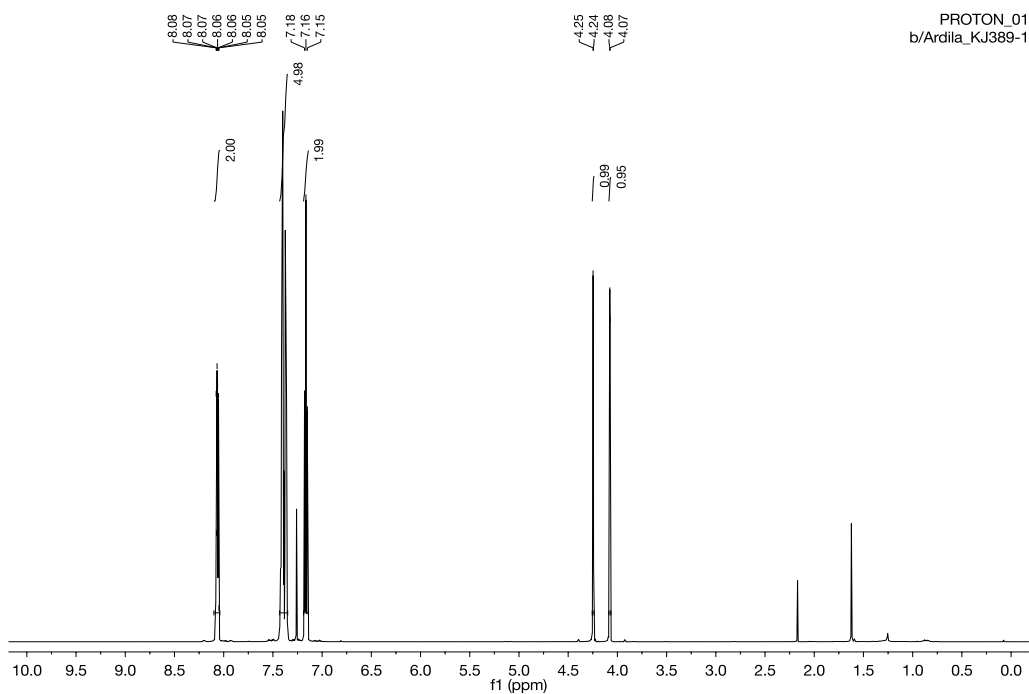

# <sup>13</sup>C NMR spectrum of epoxide 4c

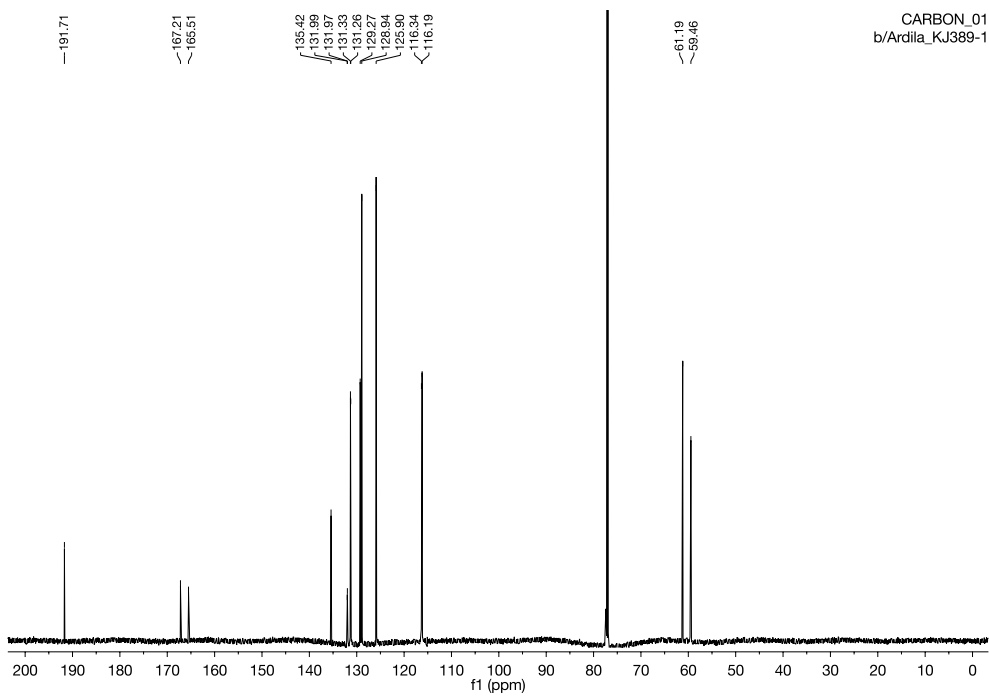

## 5. Representative IR spectra of 2a-d

### IR spectrum of oligo-Phe (2a)

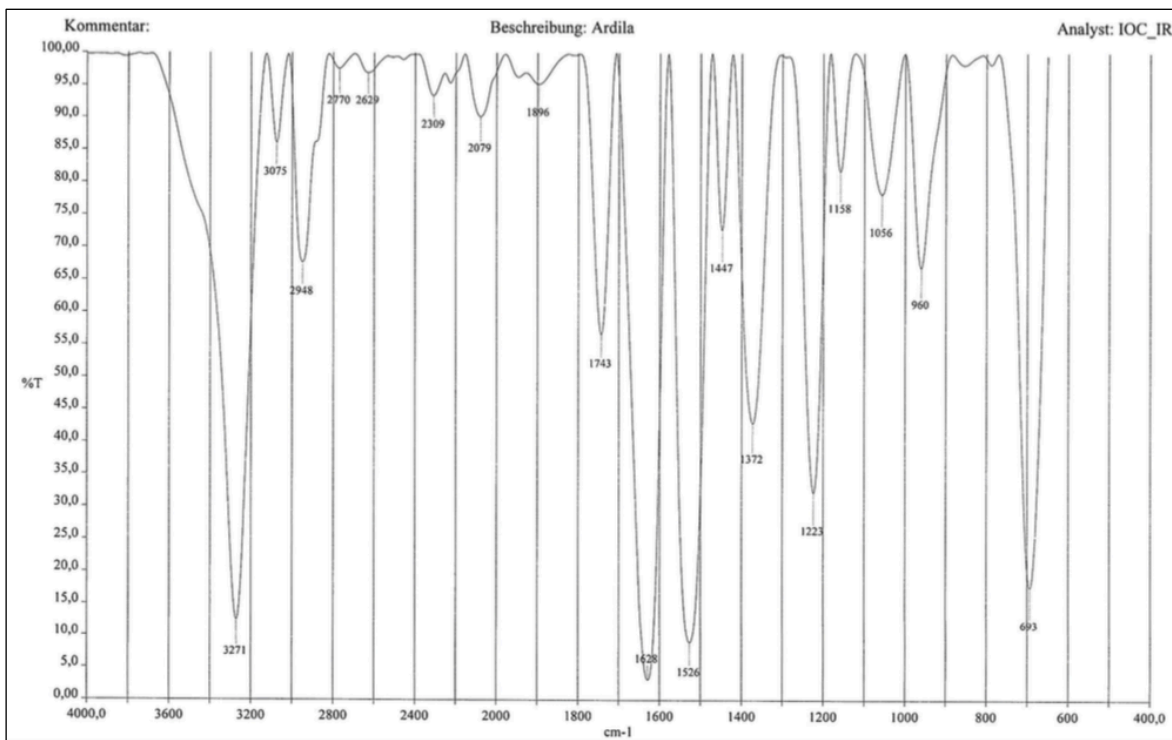

### IR Spectrum of oligo-Leu (2b)

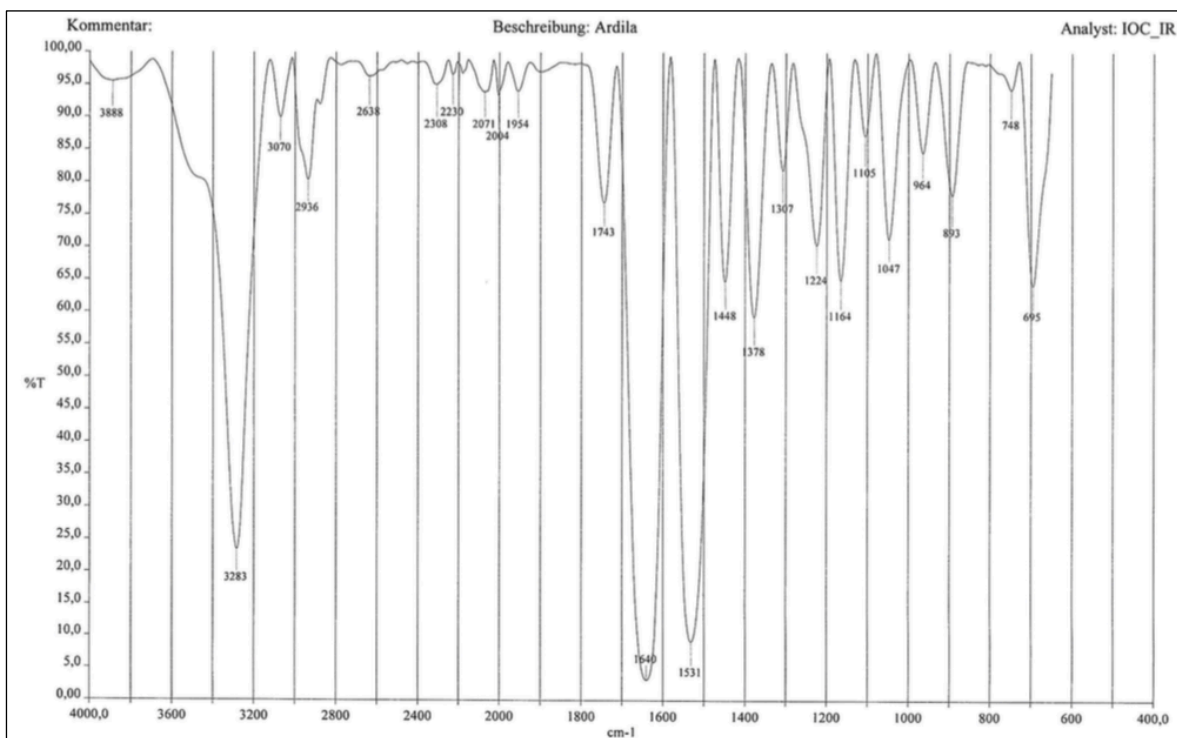

## IR Spectrum of oligo-Ala (2c)

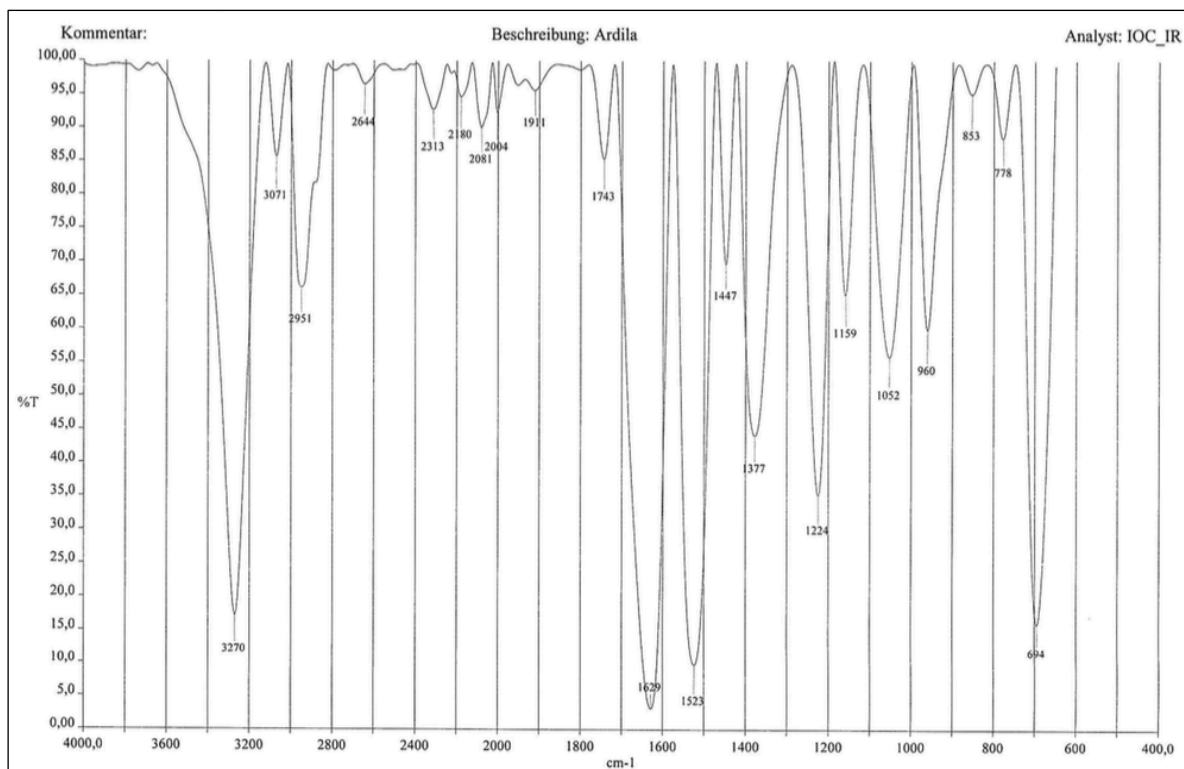

## IR Spectrum of oligo-Gly (2d)

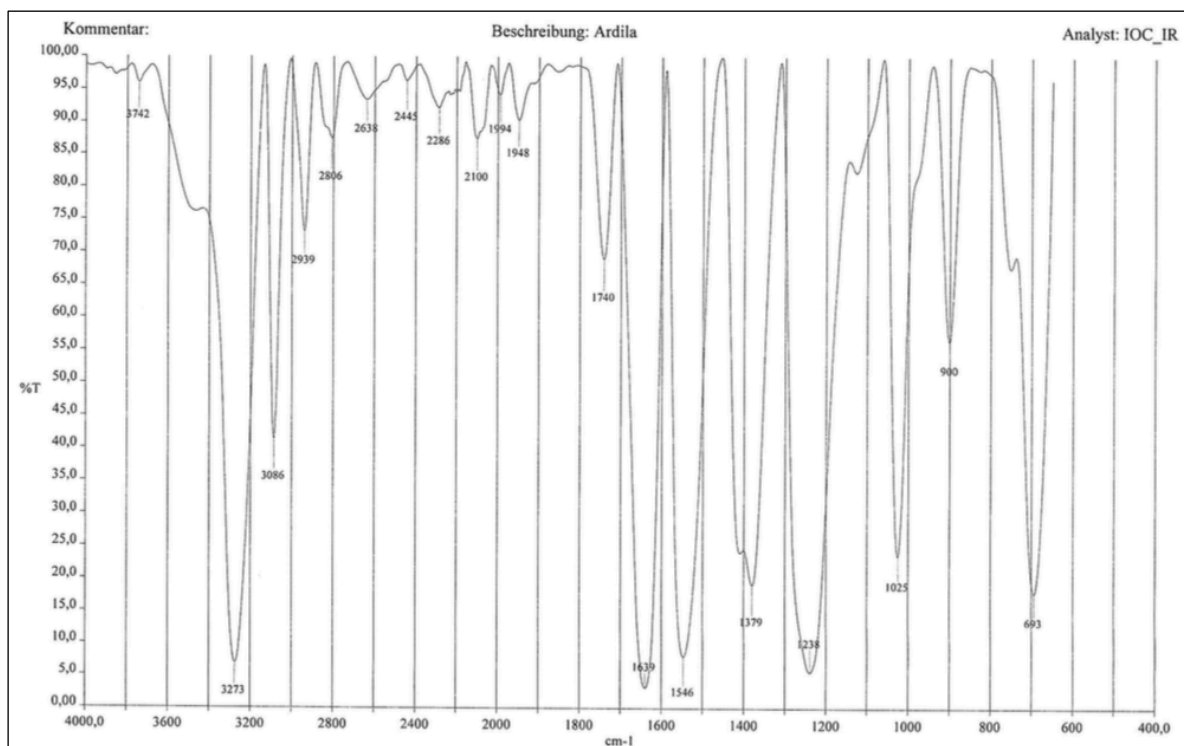

## 6. Thermogravimetric analysis (TGA) of the oligopeptides 2a-c made by twin-screw extrusion

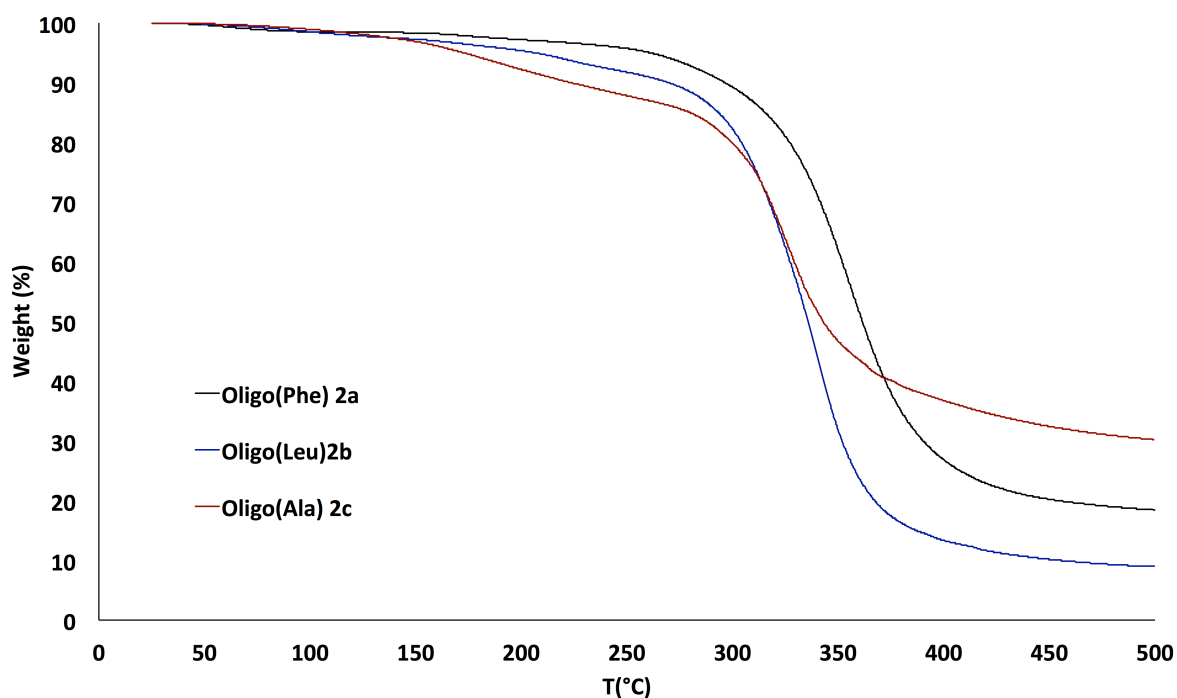

## 7. Representative MALDI-ToF MS spectra and analysis

MALDI-ToF MS mass spectrum of the oligo-Phe-OMe **2a** made in a mixer mill

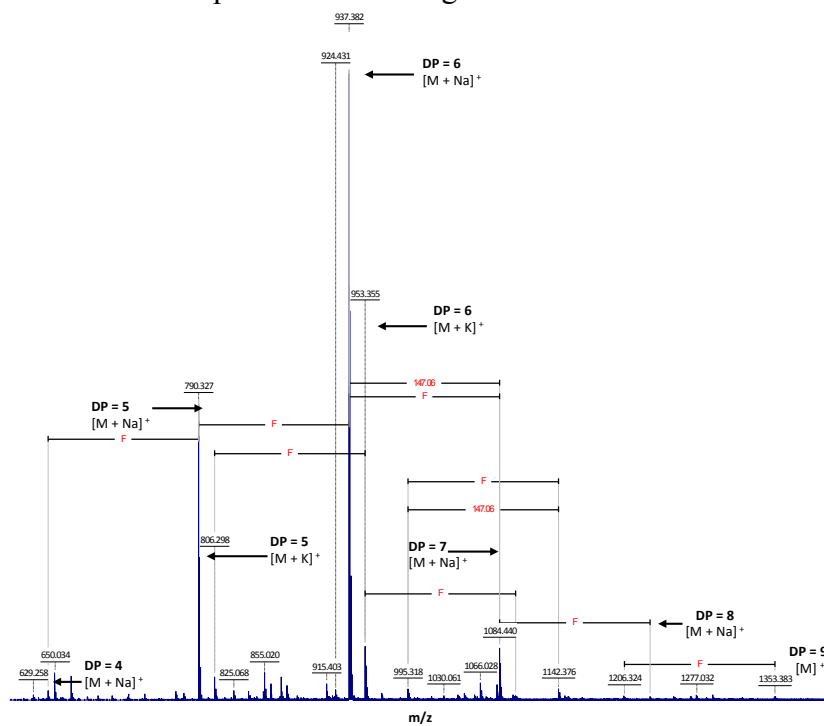

MALDI-TOF MS mass spectrum of the oligo-Leu-OMe **2b** made by extrusion

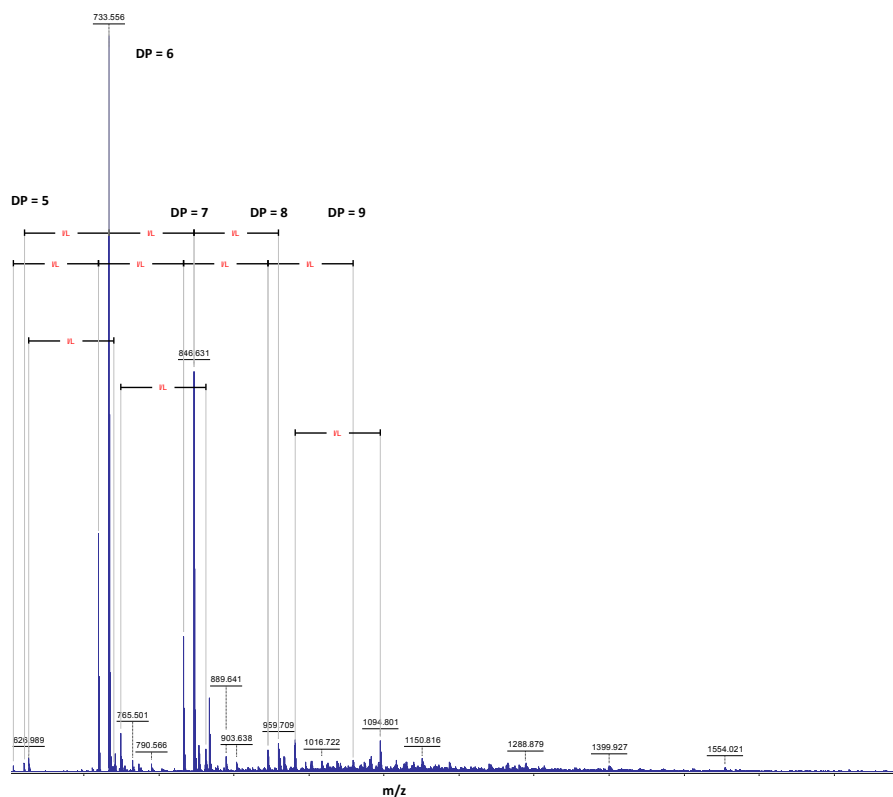

MALDI-ToF MS mass spectrum of the oligo-Ala-OMe **2c** made in a planetary ball mill

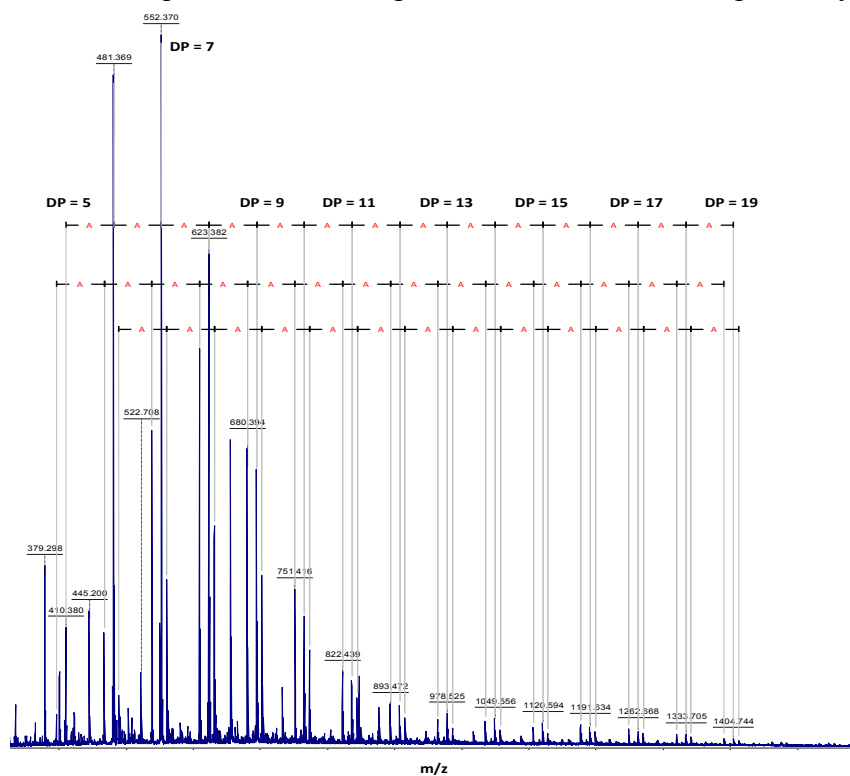

MALDI-ToF MS mass spectrum of the oligo-Gly-OMe **2d** made in a planetary ball mill

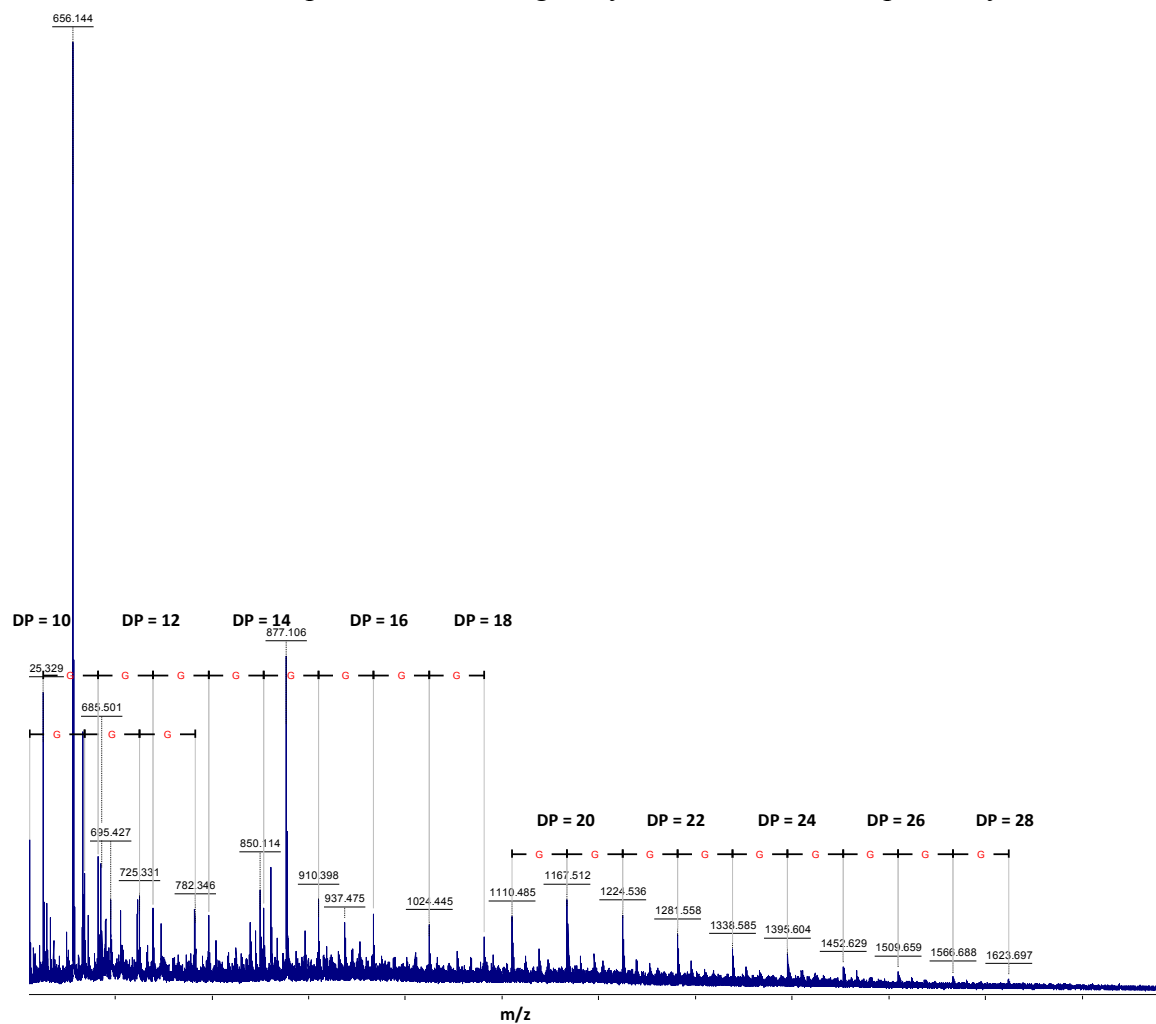

**Table S1:** Homopolymer results summary for the oligomers of Phe, Leu, Ala, and Gly (Polymerix, Sierra Analytics) by MALDI ToF MS; DP av. NMR: average DP as determined by <sup>1</sup>H NMR spectroscopy

| Oligo Phe-OMe <b>2a</b> |                 |                                                         |                   |              |        |      |                                                                                                  |
|-------------------------|-----------------|---------------------------------------------------------|-------------------|--------------|--------|------|--------------------------------------------------------------------------------------------------|
| Series Label            | Mn              | PD                                                      | DPn               | DP av. NMR   |        |      |                                                                                                  |
| Total/Average           | 1054,793        | 1,1                                                     | 7,0               | 8            |        |      |                                                                                                  |
| S1                      | 992,268         | 1,1                                                     | 6,5               |              |        |      |                                                                                                  |
| S2                      | 1270,237        | 1,2                                                     | 8,4               |              |        |      |                                                                                                  |
| S5                      | 1110,05         | 1,2                                                     | 7,4               |              |        |      |                                                                                                  |
| Series Label            | Alpha End Group | Repeat                                                  | Omega End Group   | Charge State | Adduct | Loss | Formula                                                                                          |
| S1                      | H               | C <sub>9</sub> H <sub>9</sub> NO                        | CH <sub>3</sub> O | 1            | Na     |      | H [C <sub>9</sub> H <sub>9</sub> NO] <sub>n</sub> CH <sub>3</sub> O + Na                         |
| S2                      | H               | C <sub>9</sub> H <sub>9</sub> NO                        | CH <sub>3</sub> O | 1            | K      |      | H [C <sub>9</sub> H <sub>9</sub> NO] <sub>n</sub> CH <sub>3</sub> O + K                          |
| S5                      | H               | C <sub>9</sub> H <sub>9</sub> NO                        | OH                | 1            | Na     |      | H [C <sub>9</sub> H <sub>9</sub> NO] <sub>n</sub> OH + Na                                        |
| Oligo Leu-OMe <b>2b</b> |                 |                                                         |                   |              |        |      |                                                                                                  |
| Series Label            | Mn              | PD                                                      | DPn               | DP av. NMR   |        |      |                                                                                                  |
| Total/Average           | 1172,238        | 1,2                                                     | 10,1              | 8,5          |        |      |                                                                                                  |
| S1                      | 1017,162        | 1,2                                                     | 8,7               |              |        |      |                                                                                                  |
| S2                      | 1416,739        | 1,2                                                     | 12,2              |              |        |      |                                                                                                  |
| S5                      | 1321,055        | 1,2                                                     | 11,5              |              |        |      |                                                                                                  |
| Series Label            | Alpha End Group | Repeat                                                  | Omega End Group   | Charge State | Adduct | Loss | Formula                                                                                          |
| S1                      | H               | NHCHCOCH <sub>2</sub> CHCH <sub>3</sub> CH <sub>3</sub> | CH <sub>3</sub> O | 1            | Na     |      | H [NHCHCOCH <sub>2</sub> CHCH <sub>3</sub> CH <sub>3</sub> ] <sub>n</sub> CH <sub>3</sub> O + Na |
| S2                      | H               | NHCHCOCH <sub>2</sub> CHCH <sub>3</sub> CH <sub>3</sub> | CH <sub>3</sub> O | 1            | K      |      | H [NHCHCOCH <sub>2</sub> CHCH <sub>3</sub> CH <sub>3</sub> ] <sub>n</sub> CH <sub>3</sub> O + K  |
| S5                      | H               | NHCHCOCH <sub>2</sub> CHCH <sub>3</sub> CH <sub>3</sub> | OH                | 1            | Na     |      | H [NHCHCOCH <sub>2</sub> CHCH <sub>3</sub> CH <sub>3</sub> ] <sub>n</sub> OH + Na                |
| Oligo Ala-OMe <b>2c</b> |                 |                                                         |                   |              |        |      |                                                                                                  |
| Series Label            | Mn              | PD                                                      | DPn               | DP av. NMR   |        |      |                                                                                                  |
| Total/Average           | 702,163         | 1,2                                                     | 9,5               | 15           |        |      |                                                                                                  |
| S1                      | 672,478         | 1,2                                                     | 9,0               |              |        |      |                                                                                                  |
| S4                      | 746,658         | 1,2                                                     | 10,3              |              |        |      |                                                                                                  |
| Series Label            | Alpha End Group | Repeat                                                  | Omega End Group   | Charge State | Adduct | Loss | Formula                                                                                          |

|                         |                 |                                                         |                   |              |        |                  |                                                                                                      |
|-------------------------|-----------------|---------------------------------------------------------|-------------------|--------------|--------|------------------|------------------------------------------------------------------------------------------------------|
| S1                      | H               | C <sub>3</sub> H <sub>5</sub> NO                        | CH <sub>3</sub> O | 1            | Na     |                  | H [C <sub>3</sub> H <sub>5</sub> NO] <sub>n</sub> CH <sub>3</sub> O + Na                             |
| S4                      | H               | C <sub>3</sub> H <sub>5</sub> NO                        | OH                | 1            | Na     |                  | H [C <sub>3</sub> H <sub>5</sub> NO] <sub>n</sub> OH + Na                                            |
| <b>Oligo Gly-OMe 2d</b> |                 |                                                         |                   |              |        |                  |                                                                                                      |
| Series Label            | Mn              | PD                                                      | DPn               | DP av. NMR   |        |                  |                                                                                                      |
| Total/Average           | 1277,494        | 1,2                                                     | 21,9              | 26           |        |                  |                                                                                                      |
| S1                      | 1253,551        | 1,2                                                     | 21,4              |              |        |                  |                                                                                                      |
| S3                      | 1304,891        | 1,2                                                     | 22,3              |              |        |                  |                                                                                                      |
| S5                      | 1275,923        | 1,2                                                     | 22,1              |              |        |                  |                                                                                                      |
| Series Label            | Alpha End Group | Repeat                                                  | Omega End Group   | Charge State | Adduct | Loss             | Formula                                                                                              |
| S1                      | H               | NHCH <sub>2</sub> CO                                    | CH <sub>3</sub> O | 1            | Na     |                  | H [NHCH <sub>2</sub> CO] <sub>n</sub> CH <sub>3</sub> O + Na                                         |
| S3                      | H               | NHCH <sub>2</sub> CO                                    | CH <sub>3</sub> O | 1            | K      |                  | H [NHCH <sub>2</sub> CO] <sub>n</sub> CH <sub>3</sub> O + K                                          |
| S5                      | H               | NHCH <sub>2</sub> CO                                    | OH                | 1            | Na     |                  | H [NHCH <sub>2</sub> CO] <sub>n</sub> OH + Na                                                        |
| <b>Oligo Leu-OMe 2b</b> |                 |                                                         |                   |              |        |                  |                                                                                                      |
| Series Label            | Mn              | PD                                                      | DPn               | DP av. NMR   |        |                  |                                                                                                      |
| Total/Average           | 1064,74         | 1,2                                                     | 9,2               | 8,2          |        |                  |                                                                                                      |
| S1                      | 893,705         | 1,2                                                     | 7,6               |              |        |                  |                                                                                                      |
| S2                      | 1371,252        | 1,2                                                     | 11,8              |              |        |                  |                                                                                                      |
| S5                      | 1085,477        | 1,3                                                     | 9,4               |              |        |                  |                                                                                                      |
| S6                      | 1560,971        | 1,2                                                     | 13,6              |              |        |                  |                                                                                                      |
| Series Label            | Alpha End Group | Repeat                                                  | Omega End Group   | Charge State | Adduct | Loss             | Formula                                                                                              |
| S1                      | H               | NHCHCOCH <sub>2</sub> CHCH <sub>3</sub> CH <sub>3</sub> | CH <sub>3</sub> O | 1            | Na     |                  | H [NHCHCOCH <sub>2</sub> CHCH <sub>3</sub> CH <sub>3</sub> ] <sub>n</sub> CH <sub>3</sub> O + Na     |
| S2                      | H               | NHCHCOCH <sub>2</sub> CHCH <sub>3</sub> CH <sub>3</sub> | CH <sub>3</sub> O | 1            | K      |                  | H [NHCHCOCH <sub>2</sub> CHCH <sub>3</sub> CH <sub>3</sub> ] <sub>n</sub> CH <sub>3</sub> O + K      |
| S5                      | H               | NHCHCOCH <sub>2</sub> CHCH <sub>3</sub> CH <sub>3</sub> | OH                | 1            | Na     |                  | H [NHCHCOCH <sub>2</sub> CHCH <sub>3</sub> CH <sub>3</sub> ] <sub>n</sub> OH + Na                    |
| S6                      | H               | NHCHCOCH <sub>2</sub> CHCH <sub>3</sub> CH <sub>3</sub> | OH                | 1            | Na     | H <sub>2</sub> O | H [NHCHCOCH <sub>2</sub> CHCH <sub>3</sub> CH <sub>3</sub> ] <sub>n</sub> OH + Na - H <sub>2</sub> O |



## 8. Procedure for the Juliá-Colonna epoxidation in solution

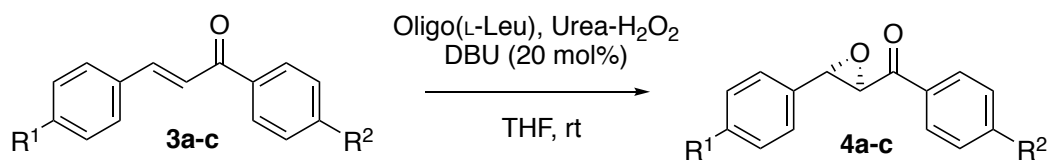

To a suspension of the mechanochemically made oligo-L-leucine catalyst<sup>1</sup> (75 mg) in THF (2 mL), chalcone derivatives (**3a-c**) (0.24 mmol), DBU (7.31 mg, 20 mol%), and urea-H<sub>2</sub>O<sub>2</sub> (27.10 mg, 0.28 mmol) were added. The reaction mixture was stirred at room temperature for 48 h; a further amount of urea-H<sub>2</sub>O<sub>2</sub> (27.10 mg, 0.28 mmol) was added to the reaction each day in order to achieve full conversion. After the reaction was complete, the oligo-L-leucine was removed by suction filtration, and washed with ethyl acetate (20 mL). The filtrate was concentrated and the products were purified by column chromatography (silica gel, n-pentane:ethyl acetate) to afford epoxides **4a-c** as a white-off solids.

## 9. Procedure for the Juliá-Colonna epoxidation in a ball mill

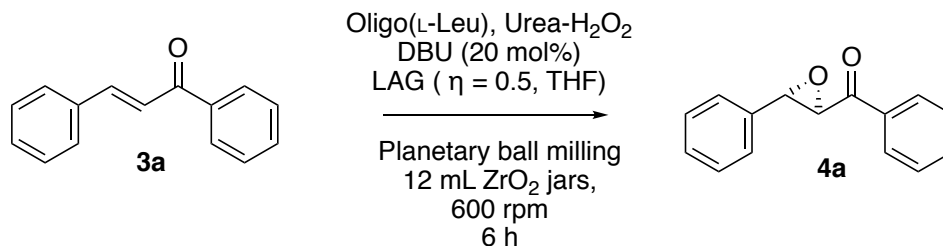

Chalcone (**3a**) (50.00 mg, 0.24 mmol), mechanochemically made oligo-L-leucine<sup>1</sup> (75 mg), DBU (7.31 mg, 20 mol%), urea-H<sub>2</sub>O<sub>2</sub> (27.10 mg, 0.28 mmol) and THF (71  $\mu$ L) were placed into a 12 mL ZrO<sub>2</sub> milling vessel with 20 ZrO<sub>2</sub> balls of 5 mm in diameter. The reaction mixture was milled for 6 h at 600 rpm (6 x 60 min; 10 min break). After the milling was stopped, the content of the milling vessel was transferred into a sintered funnel. Using a minimal amount of ethyl acetate the milling vessels were washed and the oligo-L-leucine was removed by suction filtration. The filtrate was concentrated and the product was purified by column chromatography (silica gel, n-pentane:ethyl acetate 100:1) to afford epoxide **4a** as a white-off solid.

## 10. Characterisation of products 4a-c

### (2*R*,3*S*)-Epoxy-1,3-diphenylpropan-1-one (4a)<sup>2</sup>

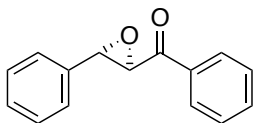

Epoxide **4a** was obtained as a white solid (75% yield, section 8);  $\nu_{\max}/\text{cm}^{-1}$  2922, 1683, 1590, 1230.  $^1\text{H NMR}$  (600 MHz,  $\text{CDCl}_3$ )  $\delta$  8.03–8.00 (m, 2H), 7.62 (tt,  $J = 7.8, 1.3$  Hz, 1H), 7.50 (dd,  $J = 8.2, 7.3$  Hz, 2H), 7.44–7.37 (m, 5H), 4.30 (d,  $J = 1.9$  Hz, 1H), 4.08 (d,  $J = 1.8$  Hz, 1H).  $^{13}\text{C}\{^1\text{H}\}$  NMR (150 MHz,  $\text{CDCl}_3$ )  $\delta$  193.2, 135.6, 134.1, 129.2, 129.0, 128.9, 128.5, 125.9, 61.2, 59.5. MS (EI, 70 eV)  $m/z$  (%) = 224 (38) [ $\text{M}^+$ ], 105 (100), 77 (12).

### (2*R*,3*S*)-Epoxy-3-(4-fluorophenyl)-1-phenylpropan-1-one (4b)<sup>3</sup>

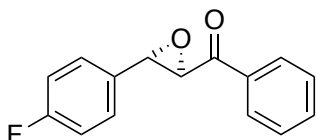

Epoxide **4b** was obtained as a white solid (83% yield, section 8);  $\nu_{\max}/\text{cm}^{-1}$  2924, 1685, 1598, 1218.  $^1\text{H NMR}$  (600 MHz,  $\text{CDCl}_3$ )  $\delta$  8.01 (d,  $J = 7.8$ , 2H), 7.66–7.60 (m, 1H), 7.52–7.48 (m, 2H), 7.35 (dd,  $J = 5.35, 3.18$  Hz, 2H), 7.12–7.08 (m, 2H), 4.26 (brs, 1H), 4.07 (brs, 1H).  $^{13}\text{C}\{^1\text{H}\}$  NMR (150 MHz,  $\text{CDCl}_3$ )  $\delta$  193.0, 163.3 (d,  $^1J(\text{C},\text{F}) = 244.9$  Hz), 135.5, 134.2, 131.3 (d,  $^4J(\text{C},\text{F}) = 2.9$  Hz), 129.0, 128.4, 127.7 (d,  $^3J(\text{C},\text{F}) = 8.6$  Hz), 116.0 (d,  $^2J(\text{C},\text{F}) = 21.8$  Hz), 61.1, 58.4. MS (EI, 70 eV)  $m/z$  (%) = 242 (24) [ $\text{M}^+$ ], 105 (100), 77 (35).

### (2*R*,3*S*)-2,3-Epoxy-3-phenyl-1-(4-fluorophenyl)-1-propan-1-one (4c)<sup>3</sup>

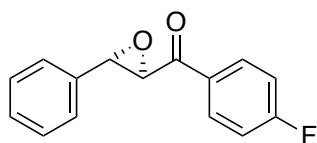

Epoxide **4c** was obtained as a white solid (78% yield, section 8);  $\nu_{\max}/\text{cm}^{-1}$  3066, 1677, 1596, 1231.  $^1\text{H NMR}$  (600 MHz,  $\text{CDCl}_3$ )  $\delta$  8.09–8.04 (m, 2H), 7.43–7.35 (m, 5H), 7.19–7.14 (m, 2H), 4.25 (d,  $J = 1.65$ , Hz, 1H), 4.08 (d,  $J = 1.61$ , 1H).  $^{13}\text{C}\{^1\text{H}\}$  NMR (150 MHz,  $\text{CDCl}_3$ )  $\delta$  191.7, 166.3 (d,  $^1J(\text{C},\text{F}) = 257.9$  Hz), 135.4, 131.9 (d,  $^4J(\text{C},\text{F}) = 3.1$  Hz), 131.2 (d,  $^3J(\text{C},\text{F}) = 9.1$  Hz), 129.2, 128.9, 125.9, 116.2 (d,  $^2J(\text{C},\text{F}) = 22.4$  Hz), 61.1, 59.4. MS (EI, 70 eV)  $m/z$  (%) = 242 (25) [ $\text{M}^+$ ], 123 (100), 95 (31).

## 11. Enantiomeric ratios of 4a-c determined by chiral stationary phase high performance liquid chromatography (CSP-HPLC)

CHIRALPAK® IA; n-heptane:EtOH 80:20, 0.8 mL/min

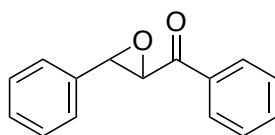

**rac-4a**  
**(2*R*,3*S*)-4a** 11.823 min  
**(2*S*,3*R*)-4a** 15.432 min

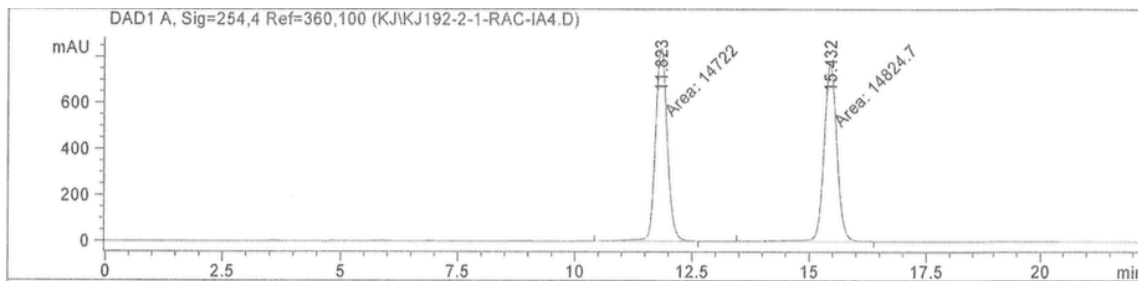

| Peak # | RetTime [min] | Type | Width [min] | Area [mAU*s] | Height [mAU] | Area %  |
|--------|---------------|------|-------------|--------------|--------------|---------|
| 1      | 11.823        | MM   | 0.2918      | 1.47220e4    | 840.91040    | 49.8262 |
| 2      | 15.432        | MM   | 0.3208      | 1.48247e4    | 770.17126    | 50.1738 |

Product obtained from the enantioselective epoxidation in solution

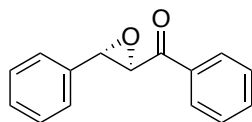

**(2*R*,3*S*)-4a**  
**95.86%**

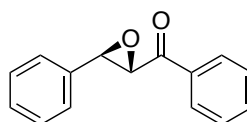

**(2*S*,3*R*)-4a**  
**4.13%**

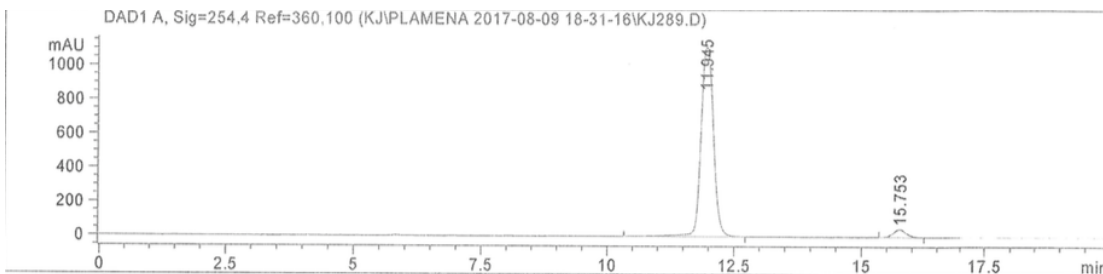

| Peak # | RetTime [min] | Type | Width [min] | Area [mAU*s] | Height [mAU] | Area %  |
|--------|---------------|------|-------------|--------------|--------------|---------|
| 1      | 11.945        | BB   | 0.2698      | 1.90185e4    | 1110.71631   | 95.8690 |
| 2      | 15.753        | BB   | 0.2742      | 819.51349    | 45.91649     | 4.1310  |

Product obtained from the enantioselective epoxidation in solution (second cycle)

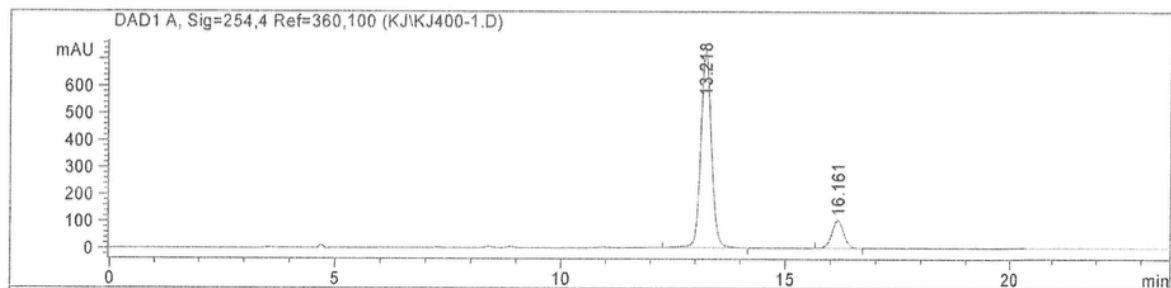

Signal 1: DAD1 A, Sig=254,4 Ref=360,100

| Peak # | RetTime [min] | Type | Width [min] | Area [mAU*s] | Height [mAU] | Area %  |
|--------|---------------|------|-------------|--------------|--------------|---------|
| 1      | 13.218        | BB   | 0.2515      | 1.19208e4    | 726.39105    | 86.3688 |
| 2      | 16.161        | BB   | 0.2811      | 1881.39441   | 102.99103    | 13.6312 |

Product obtained from the enantioselective epoxidation by ball milling.

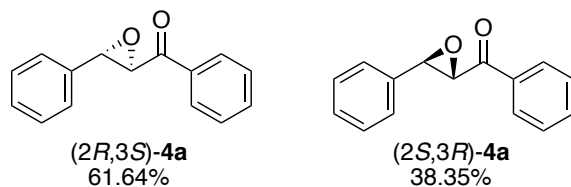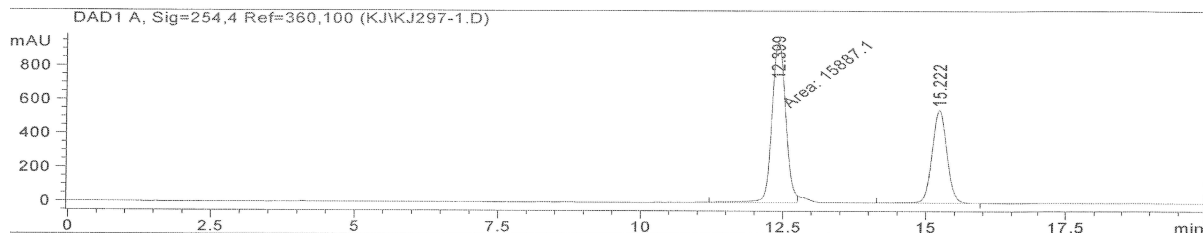

| Peak # | RetTime [min] | Type | Width [min] | Area [mAU*s] | Height [mAU] | Area %  |
|--------|---------------|------|-------------|--------------|--------------|---------|
| 1      | 12.399        | MF   | 0.2811      | 1.58871e4    | 941.96722    | 61.6402 |
| 2      | 15.222        | BB   | 0.2793      | 9886.83887   | 545.77020    | 38.3598 |

The absolute configuration of (2*R*,3*S*)-4 and (2*S*,3*R*)-4 was confirmed by comparing their experimental retention times to reported literature.<sup>4</sup> Moreover, the epoxidation of **3** was conducted using poly-L-Leu made by ring-opening polymerization of L-Leu-NCA. This experiment gave a mixture of (2*R*,3*S*)-4 (major) and (2*S*,3*R*)-4 (minor) with identical retention times compared to the values obtained utilising the mechanochemically made oligo-L-Leu **2b**.

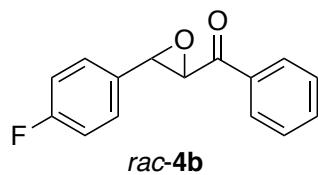

CHIRALPAK® IA; n-heptane:2-propanol 96:4, 0.8 mL/min

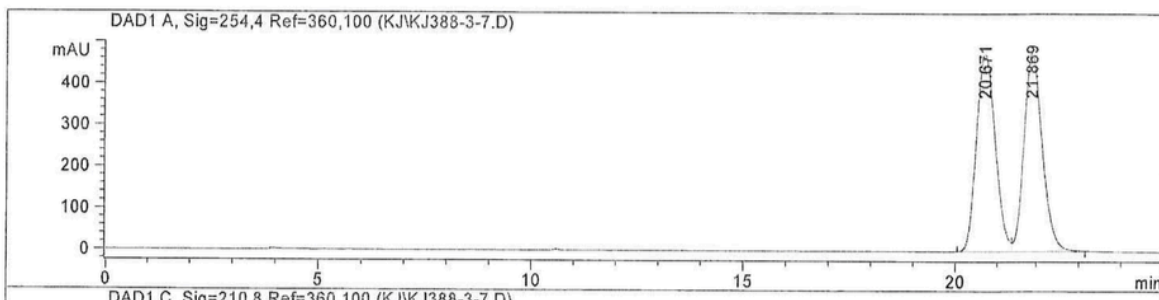

| Peak # | RetTime [min] | Type | Width [min] | Area [mAU*s] | Height [mAU] | Area %  |
|--------|---------------|------|-------------|--------------|--------------|---------|
| 1      | 20.671        | BV   | 0.4955      | 1.51270e4    | 475.05618    | 49.6364 |
| 2      | 21.869        | VB   | 0.4962      | 1.53486e4    | 476.00363    | 50.3636 |

Product obtained from the enantioselective epoxidation in solution

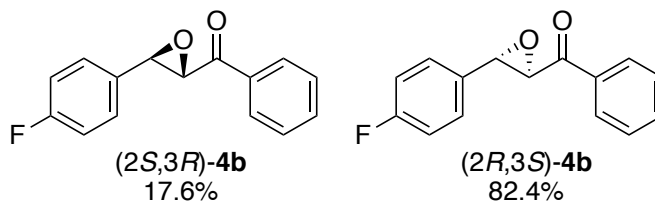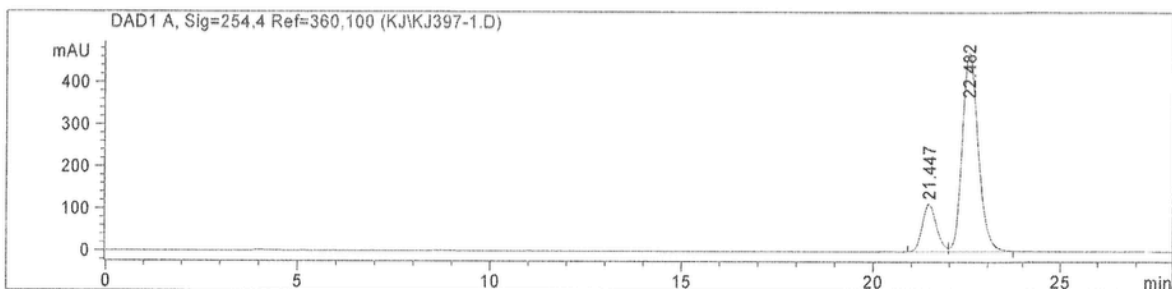

| Peak # | RetTime [min] | Type | Width [min] | Area [mAU*s] | Height [mAU] | Area %  |
|--------|---------------|------|-------------|--------------|--------------|---------|
| 1      | 21.447        | BV   | 0.3978      | 2942.41846   | 113.01099    | 17.5950 |
| 2      | 22.482        | VB   | 0.4470      | 1.37806e4    | 471.44492    | 82.4050 |

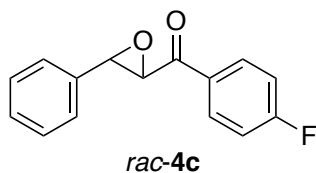

CHIRALPAK® IA; n-heptane:EtOH 80:20, 0.8 mL/min

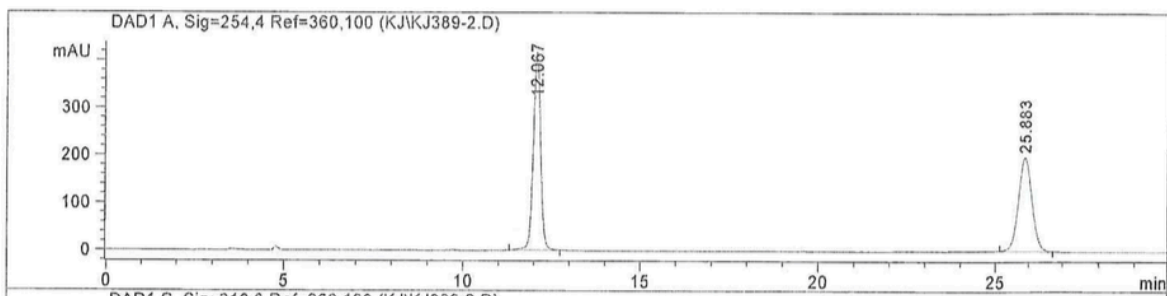

| Peak # | RetTime [min] | Type | Width [min] | Area [mAU*s] | Height [mAU] | Area %  |
|--------|---------------|------|-------------|--------------|--------------|---------|
| 1      | 12.067        | BB   | 0.2199      | 6007.69678   | 417.35529    | 51.1795 |
| 2      | 25.883        | BB   | 0.4492      | 5730.78906   | 197.09204    | 48.8205 |

Product obtained from the enantioselective epoxidation in solution

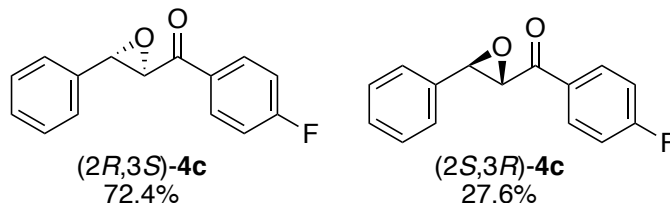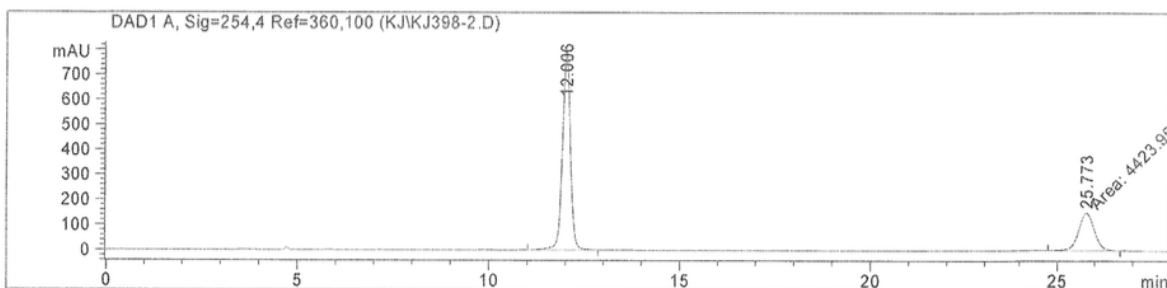

| Peak # | RetTime [min] | Type | Width [min] | Area [mAU*s] | Height [mAU] | Area %  |
|--------|---------------|------|-------------|--------------|--------------|---------|
| 1      | 12.006        | BB   | 0.2255      | 1.16185e4    | 790.48889    | 72.4235 |
| 2      | 25.773        | MM   | 0.4935      | 4423.95117   | 149.41365    | 27.5765 |

## 12. E-Factor calculations for the synthesis of oligo-Leu

### a) Planetary ball mill

Reaction and quantities. (Crystalline water coming from the  $\text{Na}_2\text{CO}_3 \cdot 10\text{H}_2\text{O}$  and water used for filtration of the oligo-Leu was not considered as a waste in the calculation).

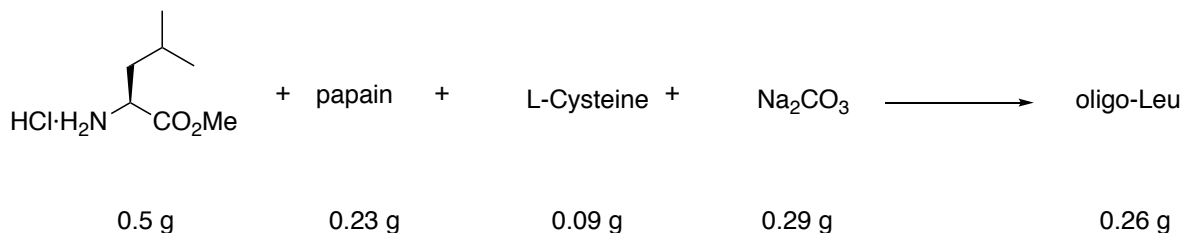

-Total amount of reactants:  $0.5 \text{ g} + 0.23 \text{ g} + 0.09 \text{ g} + 0.29 \text{ g} = 1.11 \text{ g}$

-Amount of final product:  $0.26 \text{ g}$

-Amount of waste:  $(1.11 - 0.26) \text{ g} = 0.85 \text{ g}$

-E-Factor = Amount of waste/Amount of product =  $0.85 \text{ g} / 0.26 \text{ g} = 3.26$

### b) Extruder

Reaction and quantities. (Crystalline water coming from the  $\text{Na}_2\text{CO}_3 \cdot 10\text{H}_2\text{O}$  and water used for filtration of the oligo-Leu was not considered as a waste in the calculation).

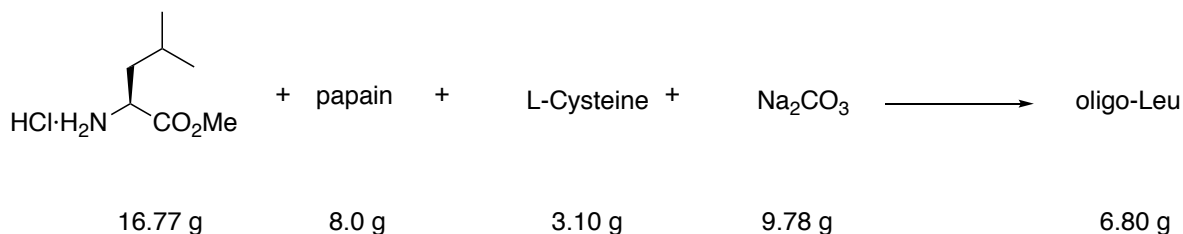

-Total amount of reactants:  $16.77 \text{ g} + 8.0 \text{ g} + 3.10 \text{ g} + 9.78 \text{ g} = 37.65 \text{ g}$

-Amount of final product:  $6.80 \text{ g}$

-Amount of waste:  $(37.65 - 6.80) \text{ g} = 30.85 \text{ g}$

-E-Factor = Amount of waste/Amount of product =  $30.85 \text{ g} / 6.80 \text{ g} = 4.53$

### c) Solution

#### Reaction and quantities

*Part 1. Synthesis of Leu-NCA.* The amounts are based on a protocol reported in the literature.<sup>5</sup>

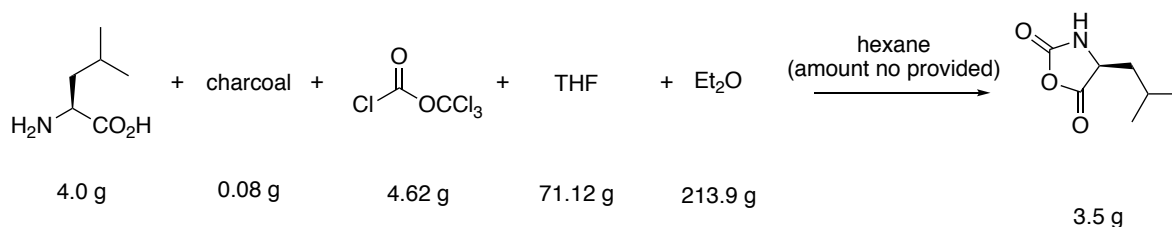

-**Total amount of reactants:** 4.0 g + 0.08 g + 4.62 g + 71.12 g + 213.9 g = 293.7 g

-**Amount of final product:** 3.5 g

-**Amount of waste:** (293.7 – 3.5) g = 290.2 g

-**E-Factor** = Amount of waste/Amount of product = 290.2 g/3.5 g = 82.91

*Part 2. ROP of Leu-NCA.* The amounts correspond to an experimental attempt to prepare oligo-Leu based on a protocol reported in the literature.<sup>5</sup>

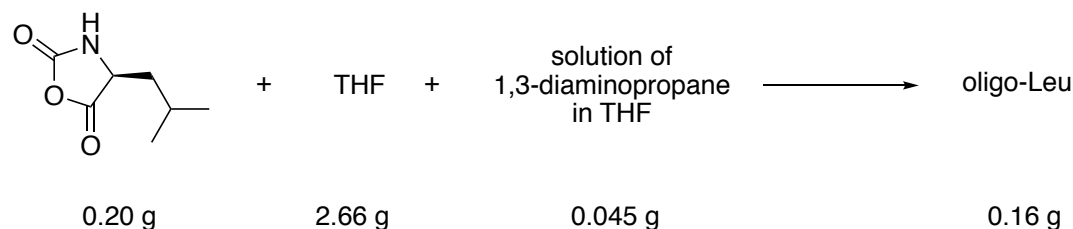

-**Total amount of reactants:** 0.2 g + 2.66 g + 0.045 g = 2.90 g

-**Amount of final product:** 0.16 g

-**Amount of waste:** (2.90 – 0.16) g = 2.74 g

-**E-Factor** = Amount of waste/Amount of product = 2.74 g/0.16 g = 17.12

-**Total E-Factor** = 82.91 + 17.12 = 100.0

### 13. References

- 1) The oligo(Leu) catalyst requires activation before use. For a detailed methodology, see: S. Baars, K.-H. Drauz, H-P. Krimmer, S.M. Roberts, J. Sander, J. Skidmore and G. Zanardi, *Org. Process Res. Dev.*, 2003, **7**, 509–513.
- 2) M. Xiang, X. Ni, X. Yi, A. Zheng, W. Wang, M. He, J. Xiong, T. Liu, Y. Ma, P. Zhu and T. Tang, *ChemCatChem*, 2015, **7**, 521–525.
- 3) C. Zeng, D. Yuan, B. Zhao and Y. Yao, *Org. Lett.*, 2015, **17**, 2242–2245.
- 4) J. Ye, Y. Wang, R. Liu, Q. Zhang, J. Chen and X. Liang, *Chem. Comm.*, 2003, 2714–2715.
- 5) C. Bérubé, X. Barbeau, P. Lagüe and N. Voyer, *Chem. Commun.*, 2017, **53**, 5099–5102.
